# Supplementary material
Source: PubMed Central journal article supplement (PMC7276206)
Supplement: NIHMS1578762-supplement-1.pdf [file NIHMS1578762-supplement-1.pdf]

## **Supplemental Material**

### **Innate and adaptive immune cell subsets as risk factors for coronary heart disease in two population-based cohorts**

Nels C. Olson, Colleen M. Sitlani, Margaret F. Doyle, Sally A. Huber, Alan L. Landay, Russell P. Tracy, Bruce M. Psaty, Joseph A. Delaney

**Supplemental Table I.** Pilot study comparing cell phenotypes from fresh and cryopreserved samples

| <b>Study</b>      | <b>Sample Type</b> | <b>n</b> | <b>CD4 (%)</b> | <b>Memory (%)</b> | <b>Naive (%)</b> | <b>Th1 (%)</b> | <b>Th2 (%)</b> |
|-------------------|--------------------|----------|----------------|-------------------|------------------|----------------|----------------|
| Pilot: All        | Cryopreserved      | 20       | 39.7           | 56.7              | 28.6             | NA             | NA             |
| CHS (pilot)       | Cryopreserved      | 12       | 37.4           | 59.7              | 29.8             | NA             | NA             |
| MESA (pilot)      | Cryopreserved      | 8        | 43.1           | 52.4              | 26.8             | 12.3           | 3.06           |
| MESA-Inflammation | Fresh              | 912      | 39.9           | 53.9              | 28.3             | 16.0           | 0.80           |

Data are presented as mean values. Peripheral blood mononuclear cell (PBMC) samples were cryopreserved in 1998-1999 in the Cardiovascular Health Study (CHS) and 2000-2002 in the Multi-Ethnic Study of Atherosclerosis (MESA). The MESA-Inflammation study evaluated cells isolated from fresh blood samples in 2005-2007. Cells were evaluated by flow cytometry as described in the Methods. Th1 and Th2 cells were not evaluated in CHS samples in the pilot study. CD4<sup>+</sup> cells were expressed as a percentage of lymphocytes. CD4<sup>+</sup> memory, CD4<sup>+</sup> naive, Th1, and Th2 cells were expressed as a percentage of CD4<sup>+</sup> cells.

**Supplemental Table II.** Antibodies used for immune cell phenotyping assays

| <b>Phenotype Assay</b>                                                       | <b>Target Antigen</b> | <b>Clone ID (Catalog #)</b> | <b>Fluorophore</b> | <b>Isotype Control Antibody [Clone ID] (Catalog #)</b> |
|------------------------------------------------------------------------------|-----------------------|-----------------------------|--------------------|--------------------------------------------------------|
| <b><math>\gamma\delta</math> T and Natural Killer cells</b>                  | CD3                   | BW264/56<br>(130-094-363)   | VioBlue            | Mouse IgG2a [S43.10]<br>(130-094-671)                  |
|                                                                              | $\gamma\delta$ TCR    | 11F2<br>(130-096-869)       | PE                 | Mouse IgG1 [IS5-21F5]<br>(130-092-212)                 |
|                                                                              | CD56                  | REA196<br>(130-100-676)     | PE-Vio770          | REA Control [REA293]<br>(130-104-616)                  |
|                                                                              | CD16                  | VEP13<br>(130-100-430)      | PerCP-Vio700       | Mouse IgM [IS5-20C4]<br>(130-098-595)                  |
| <b>CD4<sup>+</sup> and CD8<sup>+</sup> subsets (cell stimulation assays)</b> | CD4                   | VIT4<br>(130-092-374)       | APC                | Mouse IgG2a [S43.10]<br>(130-091-836)                  |
|                                                                              | CD8                   | BW135/80<br>(130-104-519)   | VioBright FITC     | Mouse IgG2a [S43.10]<br>130-104-512                    |
|                                                                              | IFN- $\gamma$         | 45-15<br>(130-096-752)      | PE-Vio770          | Mouse IgG1 [IS5-21F5]<br>(130-096-654)                 |
|                                                                              | IL-4                  | 7A3-3<br>(130-091-647)      | PE                 | Mouse IgG1 [IS5-21F5]<br>(130-092-212)                 |
|                                                                              | IL-17A                | CZ8-23G1<br>(130-096-656)   | APC-Vio770         | Mouse IgG1 [IS5-21F5]<br>(130-096-653)                 |
| <b>CD4<sup>+</sup> subsets</b>                                               | CD4                   | M-T466<br>(130-103-793)     | PerCP-Vio700       | Mouse IgG1 [IS5-21F5]<br>(130-097-561)                 |
|                                                                              | CD45RA                | T6D11<br>(130-096-604)      | APC-Vio770         | Mouse IgG2b [IS6-11E5.11]<br>(130-096-822)             |
|                                                                              | CD45RO                | UCHL1<br>(130-099-044)      | VioBlue            | Mouse IgG2a [S43.10]<br>(130-094-671)                  |
|                                                                              | CD28                  | 15E8<br>(130-092-921)       | PE                 | Mouse IgG1 [IS5-21F5]<br>(130-092-212)                 |
|                                                                              | CD38                  | IB6<br>(130-099-151)        | PE-Vio770          | Mouse IgG2a [S43.10]<br>(130-096-638)                  |
|                                                                              | CD57                  | TB03<br>(130-092-141)       | APC                | Mouse IgM [IS5-20C4]                                   |

|                                                  |                  |                           |                |                                               |
|--------------------------------------------------|------------------|---------------------------|----------------|-----------------------------------------------|
|                                                  |                  |                           |                | (130-093-176)                                 |
|                                                  | CD27             | M-T271<br>(130-104-845)   | VioBright FITC | Mouse IgG1<br>[IS5-21F5]<br>(130-104-513)     |
| <b>CD4<sup>+</sup> chemokine receptor assays</b> | CD4              | M-T466<br>(130-103-793)   | PerCP-Vio700   | Mouse IgG1<br>[IS5-21F5]<br>(130-097-561)     |
|                                                  | CD194<br>(CCR4)  | REA279<br>(130-103-814)   | PE-Vio770      | Mouse IgG1<br>[IS5-21F5]<br>(130-096-654)     |
|                                                  | CD196<br>(CCR6)  | REA190<br>(130-100-373)   | APC            | Mouse IgM<br>[IS5-20C4]<br>(130-093-176)      |
|                                                  | CD183<br>(CXCR3) | REA232<br>(130-106-009)   | VioBright FITC | Mouse IgG1<br>[IS5-21F5]<br>(130-104-513)     |
|                                                  | CD195<br>(CCR5)  | REA245<br>(130-106-223)   | PE             | Mouse IgG1<br>[IS5-21F5]<br>(130-092-212)     |
| <b>CD8<sup>+</sup> subsets</b>                   | CD8              | BW135/80<br>(130-097-911) | PerCP-Vio700   | Mouse IgG2a<br>[S43.10]<br>(130-097-563)      |
|                                                  | CD45RA           | T6D11<br>(130-096-604)    | APC-Vio770     | Mouse IgG2b<br>[IS6-11E5.11]<br>(130-096-822) |
|                                                  | CD45RO           | UCHL1<br>(130-099-044)    | VioBlue        | Mouse IgG2a<br>[S43.10]<br>(130-094-671)      |
|                                                  | CD28             | 15E8<br>(130-092-921)     | PE             | Mouse IgG1<br>[IS5-21F5]<br>(130-092-212)     |
|                                                  | CD38             | IB6<br>(130-099-151)      | PE-Vio770      | Mouse IgG2a<br>[S43.10]<br>130-096-638        |
|                                                  | CD57             | TB03<br>(130-092-141)     | APC            | Mouse IgM<br>[IS5-20C4]<br>(130-093-176)      |
|                                                  | CD27             | M-T271<br>(130-104-845)   | VioBright FITC | Mouse IgG1<br>[IS5-21F5]<br>(130-104-513)     |
| <b>B Cell subsets</b>                            | CD19             | LT19<br>(130-096-643)     | APC-Vio770     | Mouse IgG1<br>[IS5-21F5]<br>(130-096-653)     |
|                                                  | CD5              | UCHT2<br>(130-096-577)    | APC            | Mouse IgG1<br>[IS5-21F5]<br>(130-092-214)     |
|                                                  | CD27             | M-T271<br>(130-104-845)   | VioBright FITC | Mouse IgG1<br>[IS5-21F5]<br>(130-104-513)     |
| <b>Monocyte subsets</b>                          | CD14             | TÜK4                      | PE-Vio770      | Mouse IgG2a                                   |

|                                                                                                                     |       |                            |                |                                               |
|---------------------------------------------------------------------------------------------------------------------|-------|----------------------------|----------------|-----------------------------------------------|
|                                                                                                                     |       | (130-096-628)              |                | [S43.10]<br>(130-096-638)                     |
|                                                                                                                     | CD16  | VEP13<br>(130-100-430)     | PerCP-Vio700   | Mouse IgM<br>[IS5-20C4]<br>(130-098-595)      |
| <b>CD4<sup>+</sup> T Regulatory cells</b>                                                                           | CD4   | VIT4<br>(130-092-374)      | APC            | Mouse IgG2a<br>[S43.10]<br>(130-091-836)      |
|                                                                                                                     | CD25  | 4E3<br>(130-104-274)       | VioBright-FITC | Mouse IgG2b<br>[IS6-11E5.11]<br>(130-104-575) |
|                                                                                                                     | CD127 | MB15-18C9<br>(130-099-719) | PE-Vio770      | Mouse IgG2a<br>[S43.10]<br>(130-096-638)      |
|                                                                                                                     | CD6   | M-T411<br>(130-105-129)    | APC-Vio770     | Mouse IgG1<br>[IS5-21F5]<br>(130-096-653)     |
| All antibodies from Miltenyi Biotec (San Diego, CA). All assays used antibody dilutions as recommended by Miltenyi. |       |                            |                |                                               |

**Supplemental Table III.** Markers used for immune cell phenotyping

| <b>Cellular Markers</b>                                                     | <b>Phenotype</b>                     | <b>Data expressed as</b>         |
|-----------------------------------------------------------------------------|--------------------------------------|----------------------------------|
| <i>Monocytes</i>                                                            |                                      |                                  |
| CD14 <sup>++</sup> CD16 <sup>-</sup> (†)                                    | Classical Monocytes                  | % of CD14 <sup>+</sup> monocytes |
| CD14 <sup>+</sup> CD16 <sup>+</sup> (†)                                     | Intermediate Monocytes               | % of CD14 <sup>+</sup> monocytes |
| CD14 <sup>+</sup> CD16 <sup>++</sup> (†)                                    | Non-Classical Monocytes              | % of CD14 <sup>+</sup> monocytes |
| <i>Innate Lymphocytes</i>                                                   |                                      |                                  |
| CD3 <sup>-</sup> CD16 <sup>+</sup> CD56 <sup>+</sup>                        | Natural Killer cells                 | % of lymphocytes                 |
| CD3 <sup>+</sup> γδTCR <sup>+</sup>                                         | γδ T cells                           | % of CD3 <sup>+</sup> cells      |
| <i>CD4<sup>+</sup> T helper (Th) Cells</i>                                  |                                      |                                  |
| CD4 <sup>+</sup>                                                            | Pan CD4 <sup>+</sup> T cells         | % of lymphocytes                 |
| CD4 <sup>+</sup> IFN-γ <sup>+</sup> (†)                                     | Th1                                  | % of CD4 <sup>+</sup> cells      |
| CD4 <sup>+</sup> IL-4 <sup>+</sup> (†)                                      | Th2                                  | % of CD4 <sup>+</sup> cells      |
| CD4 <sup>+</sup> IL-17A <sup>+</sup> (†)                                    | Th17                                 | % of CD4 <sup>+</sup> cells      |
| CD4 <sup>+</sup> CXCR3 <sup>+</sup> CCR4 <sup>-</sup> CCR6 <sup>-</sup> (‡) | Th1                                  | % of CD4 <sup>+</sup> cells      |
| CD4 <sup>+</sup> CXCR3 <sup>-</sup> CCR4 <sup>+</sup> CCR6 <sup>-</sup> (‡) | Th2                                  | % of CD4 <sup>+</sup> cells      |
| CD4 <sup>+</sup> CXCR3 <sup>-</sup> CCR4 <sup>+</sup> CCR6 <sup>+</sup> (‡) | Th17                                 | % of CD4 <sup>+</sup> cells      |
| CD4 <sup>+</sup> CD25 <sup>+</sup> CD127 <sup>-</sup>                       | T regulatory (Treg) cells            | % of CD4 <sup>+</sup> cells      |
| CD4 <sup>+</sup> CD45RA <sup>+</sup>                                        | Naive CD4 <sup>+</sup>               | % of CD4 <sup>+</sup> cells      |
| CD4 <sup>+</sup> CD45RO <sup>+</sup>                                        | Memory CD4 <sup>+</sup>              | % of CD4 <sup>+</sup> cells      |
| CD4 <sup>+</sup> CD25 <sup>+</sup>                                          | Activated or Treg CD4 <sup>+</sup>   | % of CD4 <sup>+</sup> cells      |
| CD4 <sup>+</sup> CD38 <sup>+</sup>                                          | Activated or mature CD4 <sup>+</sup> | % of CD4 <sup>+</sup> cells      |
| CD4 <sup>+</sup> CD28 <sup>-</sup>                                          | Differentiated / Senescent           | % of CD4 <sup>+</sup> cells      |
| CD4 <sup>+</sup> CD57 <sup>+</sup>                                          | Differentiated / Senescent           | % of CD4 <sup>+</sup> cells      |
| CD4 <sup>+</sup> CD28 <sup>-</sup> CD57 <sup>+</sup>                        | Differentiated / Senescent           | % of CD4 <sup>+</sup> cells      |
| CD4 <sup>+</sup> CD28 <sup>-</sup> CD57 <sup>+</sup> CD45RA <sup>+</sup>    | TEMRA                                | % of CD4 <sup>+</sup> cells      |
| <i>CD8<sup>+</sup> Cytotoxic T cells (Tc)</i>                               |                                      |                                  |
| CD8 <sup>+</sup>                                                            | Pan CD8 <sup>+</sup> T cells         | % of lymphocytes                 |
| CD8 <sup>+</sup> IFN-γ <sup>+</sup> (†)                                     | Tc1                                  | % of CD8 <sup>+</sup> cells      |
| CD8 <sup>+</sup> IL-4 <sup>+</sup> (†)                                      | Tc2                                  | % of CD8 <sup>+</sup> cells      |
| CD8 <sup>+</sup> IL-17A <sup>+</sup> (†)                                    | Tc17                                 | % of CD8 <sup>+</sup> cells      |
| CD8 <sup>+</sup> CD45RA <sup>+</sup>                                        | Naive CD8 <sup>+</sup>               | % of CD8 <sup>+</sup> cells      |
| CD8 <sup>+</sup> CD45RO <sup>+</sup>                                        | Memory CD8 <sup>+</sup>              | % of CD8 <sup>+</sup> cells      |
| CD8 <sup>+</sup> CD38 <sup>+</sup>                                          | Activated or mature CD8 <sup>+</sup> | % of CD8 <sup>+</sup> cells      |
| CD8 <sup>+</sup> CD28 <sup>-</sup>                                          | Differentiated / Senescent           | % of CD8 <sup>+</sup> cells      |
| CD8 <sup>+</sup> CD57 <sup>+</sup>                                          | Differentiated / Senescent           | % of CD8 <sup>+</sup> cells      |
| CD8 <sup>+</sup> CD28 <sup>-</sup> CD57 <sup>+</sup>                        | Differentiated / Senescent           | % of CD8 <sup>+</sup> cells      |
| CD8 <sup>+</sup> CD28 <sup>-</sup> CD57 <sup>+</sup> CD45RA <sup>+</sup>    | TEMRA                                | % of CD8 <sup>+</sup> cells      |
| <i>B cells</i>                                                              |                                      |                                  |

|                                                        |                      |                                |
|--------------------------------------------------------|----------------------|--------------------------------|
| CD19 <sup>+</sup>                                      | Pan B cells          | % of lymphocytes               |
| CD19 <sup>+</sup> CD5 <sup>+</sup>                     | Transitional B cells | % of CD19 <sup>+</sup> B cells |
| CD19 <sup>+</sup> CD5 <sup>+</sup> CD27 <sup>-</sup>   | Transitional B cells | % of CD19 <sup>+</sup> B cells |
| CD19 <sup>+</sup> CD27 <sup>+</sup>                    | Memory B cells       | % of CD19 <sup>+</sup> B cells |
| CD19 <sup>+</sup> CD5 <sup>-</sup> CD27 <sup>+</sup>   | Memory B cells       | % of CD19 <sup>+</sup> B cells |
| (†): Measured in MESA only. (‡): Measured in CHS only. |                      |                                |

**Supplemental Table IV.** Characteristics of immune cell traits in MESA and CHS

|                                                                          | MESA     |                  | CHS      |                  |
|--------------------------------------------------------------------------|----------|------------------|----------|------------------|
|                                                                          | <i>n</i> | Mean (SD)<br>(%) | <i>n</i> | Mean (SD)<br>(%) |
| Classical monocyte<br>(CD14 <sup>++</sup> CD16 <sup>-</sup> )            | 922      | 74.5 (10.1)      | NA       | -                |
| Intermediate monocyte<br>(CD14 <sup>+</sup> CD16 <sup>+</sup> )          | 922      | 18.1 (7.1)       | NA       | -                |
| Non-Classical monocyte<br>(CD14 <sup>+</sup> CD16 <sup>++</sup> )        | 922      | 7.4 (7.4)        | NA       | -                |
| Natural killer                                                           | 1087     | 5.0 (5.7)        | 806      | 5.5 (5.1)        |
| δγ T                                                                     | 1087     | 6.6 (6.1)        | 789      | 5.0 (5.0)        |
| CD4 <sup>+</sup>                                                         | 1051     | 50.0 (11.1)      | 863      | 53.7 (13.2)      |
| Th1*                                                                     | 770      | 15.3 (9.0)       | 516      | 20.1 (9.0)       |
| Th2*                                                                     | 770      | 2.9 (1.8)        | 516      | 6.7 (4.4)        |
| Th17*                                                                    | 770      | 2.2 (1.5)        | 516      | 4.3 (3.6)        |
| Treg (CD4 <sup>+</sup> CD25 <sup>+</sup> CD127 <sup>-</sup> )            | 1035     | 5.0 (2.2)        | 791      | 6.1 (5.1)        |
| Naive (CD4 <sup>+</sup> CD45RA <sup>+</sup> )                            | 1051     | 26.1 (12.0)      | 863      | 26.0 (11.8)      |
| Memory (CD4 <sup>+</sup> CD45RO <sup>+</sup> )                           | 1051     | 51.8 (13.4)      | 863      | 42.1 (13.0)      |
| CD4 <sup>+</sup> CD25 <sup>+</sup>                                       | 1036     | 32.5 (11.4)      | 791      | 27.1 (13.2)      |
| CD4 <sup>+</sup> CD38 <sup>+</sup>                                       | 1051     | 26.2 (12.2)      | 863      | 30.3 (15.6)      |
| CD4 <sup>+</sup> CD28 <sup>-</sup>                                       | 1051     | 13.9 (9.9)       | 863      | 21.7 (14.7)      |
| CD4 <sup>+</sup> CD57 <sup>+</sup>                                       | 1051     | 22.4 (12.9)      | 862      | 25.5 (14.4)      |
| CD4 <sup>+</sup> CD28 <sup>-</sup> CD57 <sup>+</sup>                     | 1051     | 9.8 (8.4)        | 863      | 13.5 (9.9)       |
| CD4 <sup>+</sup> CD28 <sup>-</sup> CD57 <sup>+</sup> CD45RA <sup>+</sup> | 1051     | 5.6 (5.3)        | 862      | 7.8 (6.4)        |
| CD8 <sup>+</sup>                                                         | 1062     | 23.7 (9.3)       | 881      | 16.8 (9.6)       |
| Tc1 (CD8 <sup>+</sup> IFN-γ <sup>+</sup> )                               | 770      | 41.3 (17.9)      | NA       | -                |
| Tc2 (CD8 <sup>+</sup> IL-4 <sup>+</sup> )                                | 770      | 7.1 (5.0)        | NA       | -                |
| Tc17 (CD8 <sup>+</sup> IL-17A <sup>+</sup> )                             | 770      | 5.5 (5.8)        | NA       | -                |
| CD8 <sup>+</sup> CD45RA <sup>+</sup>                                     | 1062     | 52.3 (14.7)      | 882      | 38.7 (15.0)      |
| CD8 <sup>+</sup> CD45RO <sup>+</sup>                                     | 1062     | 21.8 (10.7)      | 875      | 25.9 (12.8)      |
| CD8 <sup>+</sup> CD38 <sup>+</sup>                                       | 1062     | 23.6 (12.2)      | 882      | 35.5 (21.1)      |
| CD8 <sup>+</sup> CD28 <sup>-</sup>                                       | 1062     | 55.6 (15.8)      | 882      | 45.7 (17.5)      |
| CD8 <sup>+</sup> CD57 <sup>+</sup>                                       | 1062     | 59.4 (15.3)      | 720      | 44.9 (17.2)      |
| CD8 <sup>+</sup> CD28 <sup>-</sup> CD57 <sup>+</sup>                     | 1062     | 44.5 (15.7)      | 882      | 33.0 (15.7)      |
| CD8 <sup>+</sup> CD28 <sup>-</sup> CD57 <sup>+</sup> CD45RA <sup>+</sup> | 1062     | 32.7 (14.2)      | 720      | 6.0 (7.9)        |
| CD19 <sup>+</sup> B cells                                                | 1089     | 11.3 (7.4)       | 806      | 16.8 (13.1)      |
| CD19 <sup>+</sup> CD5 <sup>+</sup>                                       | 1089     | 54.8 (22.4)      | 807      | 52.7 (25.4)      |
| CD19 <sup>+</sup> CD27 <sup>+</sup>                                      | 1089     | 42.7 (16.4)      | 807      | 38.0 (19.1)      |
| CD19 <sup>+</sup> CD5 <sup>+</sup> CD27 <sup>-</sup>                     | 1089     | 30.8 (18.3)      | 806      | 29.6 (24.3)      |
| CD19 <sup>+</sup> CD5 <sup>+</sup> CD27 <sup>+</sup>                     | 1089     | 18.7 (12.7)      | 806      | 15.0 (12.1)      |

*n* represents the number of participants with data for each immune cell trait. \* Th1, Th2, and Th17 cells were phenotyped using different methods in MESA and CHS. MESA used intracellular cytokine staining; CHS stained cell surface receptors. Monocyte and Tc1/2/17 cell assays were not performed in CHS.



**Supplemental Table V.** Associations of innate and adaptive immune cell subsets included as secondary hypotheses with incident myocardial infarction

|                                                                          | Hazards Ratios (confidence intervals) of MI |                   |                           |
|--------------------------------------------------------------------------|---------------------------------------------|-------------------|---------------------------|
|                                                                          | MESA                                        | CHS               | MESA-CHS<br>Meta-analysis |
| CD14 <sup>++</sup> CD16 <sup>-</sup>                                     | 1.12 (0.83, 1.51)                           | NA                | NA                        |
| CD14 <sup>+</sup> CD16 <sup>+</sup>                                      | 0.88 (0.63, 1.23)                           | NA                | NA                        |
| CD14 <sup>+</sup> CD16 <sup>++</sup>                                     | 0.97 (0.72, 1.31)                           | NA                | NA                        |
|                                                                          |                                             |                   |                           |
| Natural killer                                                           | 0.99 (0.76, 1.29)                           | 1.02 (0.83, 1.26) | 1.01 (0.86, 1.19)         |
| γδ T                                                                     | 1.04 (0.81, 1.34)                           | 1.04 (0.84, 1.28) | 1.04 (0.88, 1.22)         |
|                                                                          |                                             |                   |                           |
| CD4 <sup>+</sup>                                                         | 0.92 (0.69, 1.24)                           | 0.91 (0.74, 1.12) | 0.91 (0.77, 1.08)         |
| CD4 <sup>+</sup> CD25 <sup>+</sup>                                       | 0.91 (0.70, 1.20)                           | 1.11 (0.91, 1.36) | 1.07 (0.91, 1.25)         |
| CD4 <sup>+</sup> CD38 <sup>+</sup>                                       | 1.01 (0.74, 1.38)                           | 1.08 (0.88, 1.34) | 1.06 (0.89, 1.26)         |
| CD4 <sup>+</sup> CD57 <sup>+</sup>                                       | 1.16 (0.88, 1.53)                           | 1.04 (0.85, 1.27) | 1.08 (0.92, 1.27)         |
| CD4 <sup>+</sup> CD28 <sup>-</sup> CD57 <sup>+</sup>                     | 1.10 (0.83, 1.47)                           | 0.97 (0.78, 1.20) | 1.01 (0.85, 1.20)         |
| CD4 <sup>+</sup> CD28 <sup>-</sup> CD57 <sup>+</sup> CD45RA <sup>+</sup> | 1.07 (0.82, 1.40)                           | 0.97 (0.78, 1.21) | 1.01 (0.85, 1.19)         |
|                                                                          |                                             |                   |                           |
| CD8 <sup>+</sup>                                                         | 1.13 (0.86, 1.48)                           | 1.04 (0.83, 1.30) | 1.08 (0.91, 1.28)         |
| Tc1 (CD8 <sup>+</sup> IFN-γ <sup>+</sup> )                               | 1.21 (0.89, 1.63)                           | NA                | NA                        |
| Tc2 (CD8 <sup>+</sup> IL-4 <sup>+</sup> )                                | 1.05 (0.76, 1.44)                           | NA                | NA                        |
| Tc17 (CD8 <sup>+</sup> IL-17A <sup>+</sup> )                             | 1.12 (0.84, 1.48)                           | NA                | NA                        |
| CD8 <sup>+</sup> CD45RA <sup>+</sup>                                     | 1.03 (0.78, 1.37)                           | 1.08 (0.88, 1.32) | 1.06 (0.90, 1.25)         |
| CD8 <sup>+</sup> CD45RO <sup>+</sup>                                     | 0.93 (0.72, 1.21)                           | 0.95 (0.77, 1.17) | 0.94 (0.80, 1.11)         |
| CD8 <sup>+</sup> CD38 <sup>+</sup>                                       | 1.03 (0.78, 1.36)                           | 0.99 (0.80, 1.24) | 1.01 (0.85, 1.20)         |
| CD8 <sup>+</sup> CD28 <sup>-</sup>                                       | 1.16 (0.87, 1.55)                           | 1.09 (0.87, 1.35) | 1.11 (0.93, 1.33)         |
| CD8 <sup>+</sup> CD57 <sup>+</sup>                                       | 1.17 (0.90, 1.53)                           | 1.04 (0.84, 1.29) | 1.09 (0.92, 1.29)         |
| CD8 <sup>+</sup> CD28 <sup>-</sup> CD57 <sup>+</sup>                     | 1.18 (0.90, 1.55)                           | 1.07 (0.86, 1.32) | 1.11 (0.94, 1.31)         |
| CD8 <sup>+</sup> CD28 <sup>-</sup> CD57 <sup>+</sup> CD45RA <sup>+</sup> | 1.14 (0.88, 1.49)                           | 0.98 (0.78, 1.24) | 1.05 (0.88, 1.25)         |
|                                                                          |                                             |                   |                           |
| CD19 <sup>+</sup>                                                        | 0.96 (0.69, 1.35)                           | 0.95 (0.75, 1.20) | 0.95 (0.79, 1.15)         |
| CD19 <sup>+</sup> CD5 <sup>+</sup>                                       | 0.93 (0.72, 1.20)                           | 1.02 (0.82, 1.26) | 0.98 (0.83, 1.16)         |
| CD19 <sup>+</sup> CD27 <sup>+</sup>                                      | 1.02 (0.75, 1.41)                           | 1.06 (0.85, 1.32) | 1.05 (0.88, 1.26)         |
| CD19 <sup>+</sup> CD5 <sup>+</sup> CD27 <sup>-</sup>                     | 0.93 (0.71, 1.22)                           | 0.97 (0.78, 1.22) | 0.95 (0.80, 1.14)         |
| CD19 <sup>+</sup> CD5 <sup>-</sup> CD27 <sup>+</sup>                     | 1.05 (0.78, 1.41)                           | 1.01 (0.81, 1.25) | 1.02 (0.86, 1.22)         |

Cell phenotypes were analyzed per 1-SD higher values using Cox models with sampling weights and robust (sandwich) standard error estimates. CIs reflect the Bonferroni-adjusted significance level of  $p < 0.0015$ . Models were adjusted for age, sex, race/ethnicity, education, clinical site, systolic blood pressure, use of antihypertensive medication, low-density lipoprotein cholesterol, use of statins, smoking status, and diabetes. NA indicates phenotypes that were not evaluated in CHS.

**Supplemental Figure I. Monocyte flow cytometry gating scheme**

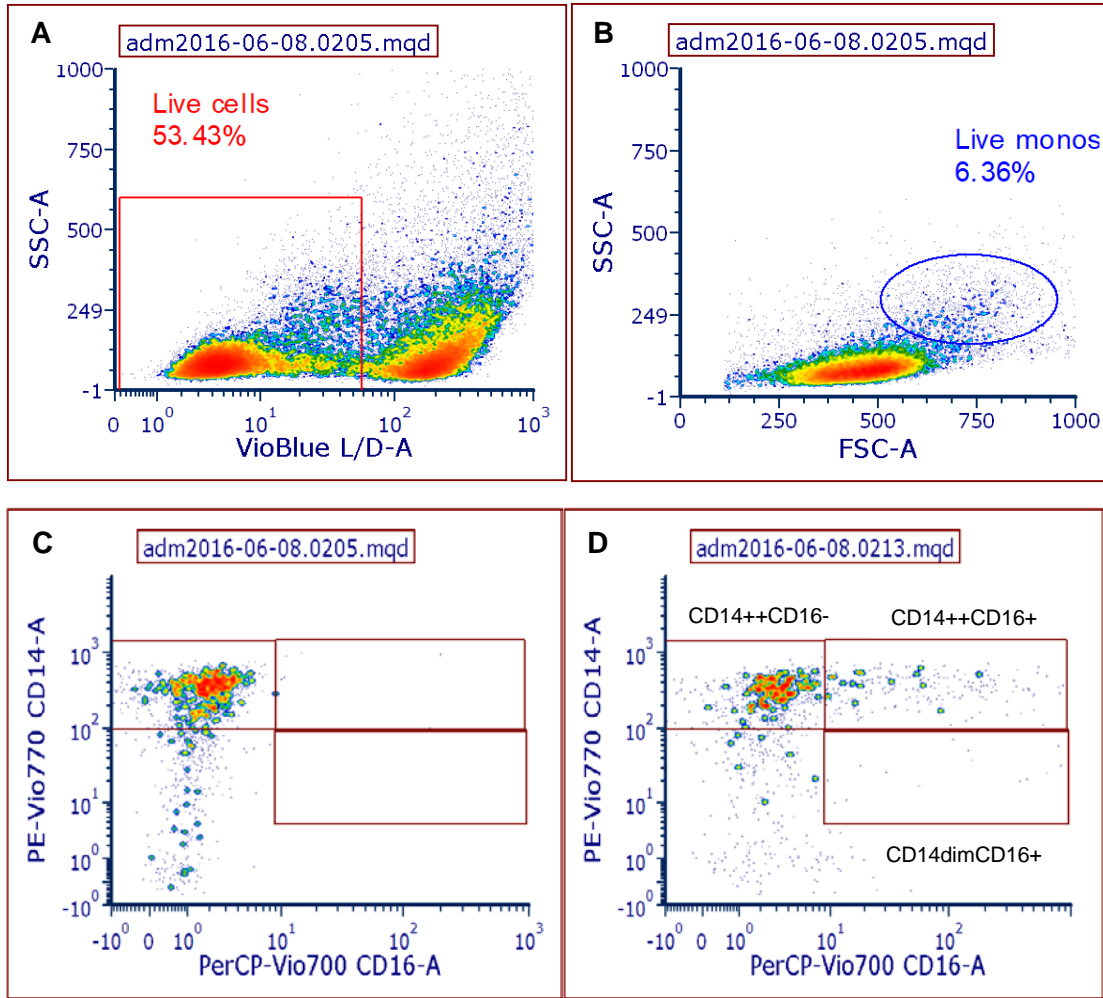

A.) PBMCs gated on live cells; B.) Gate on monocytes within the live cell gate; C.) CD14+ vs. CD16 isotype within the monocyte gate; D.) CD14+ vs. CD16+ within the monocyte gate.

**Supplemental Figure II.** Flow cytometry gating schemes for CD3+ T, CD19+ B, Natural Killer, and  $\gamma\delta$  T cells

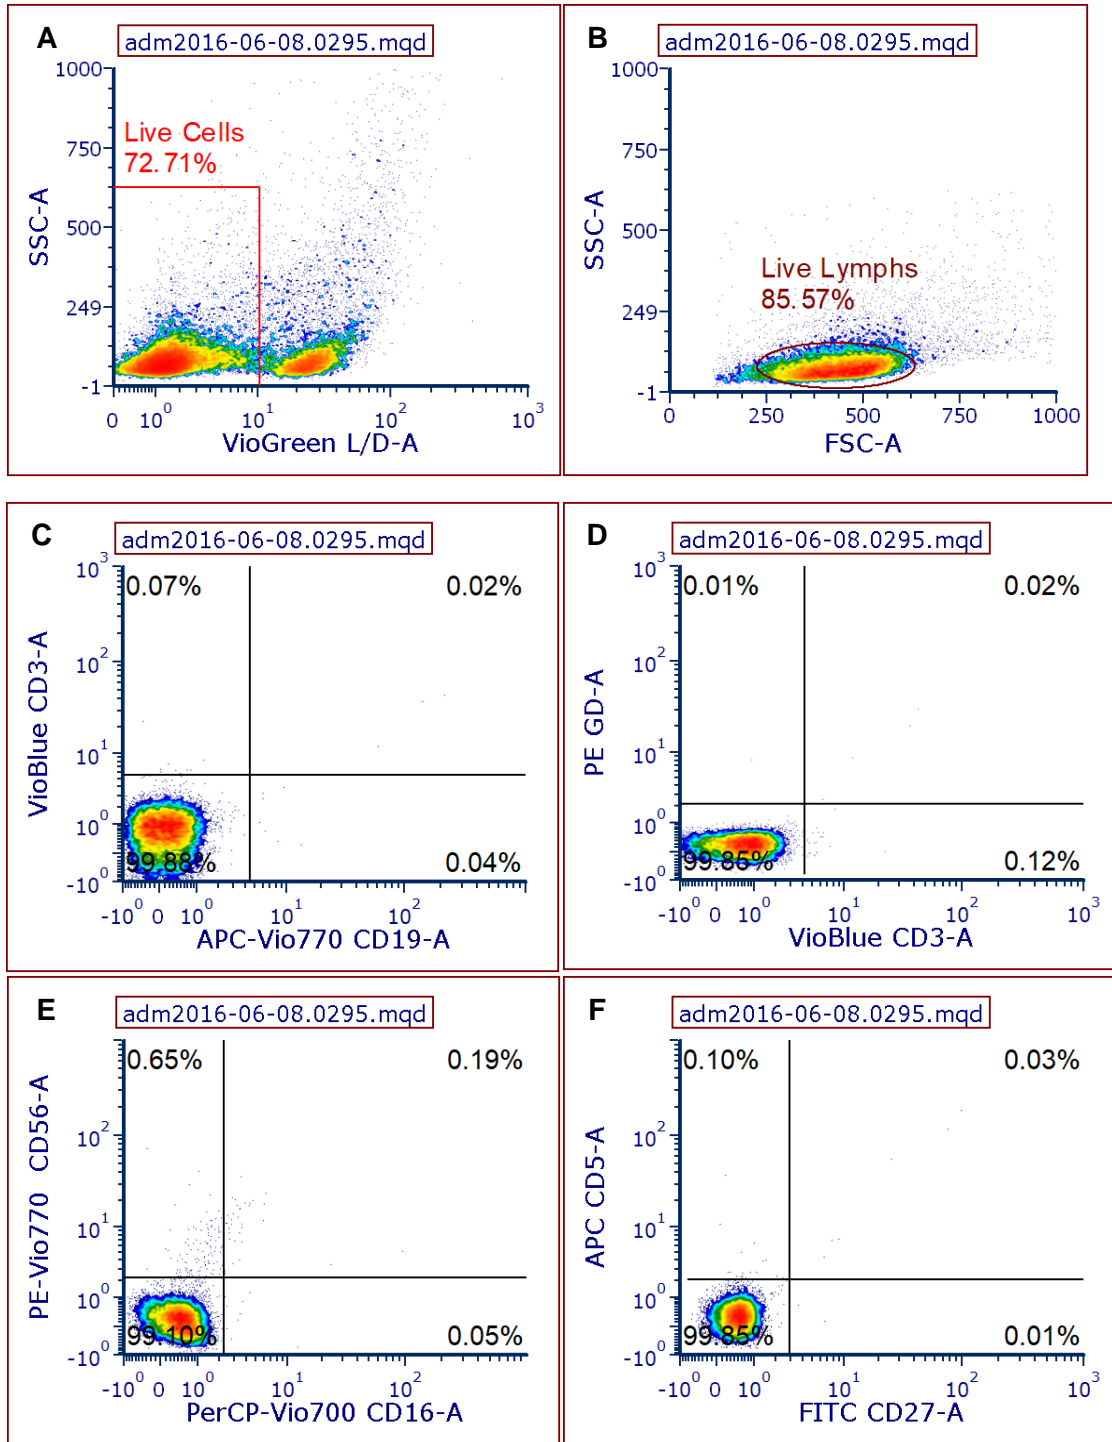

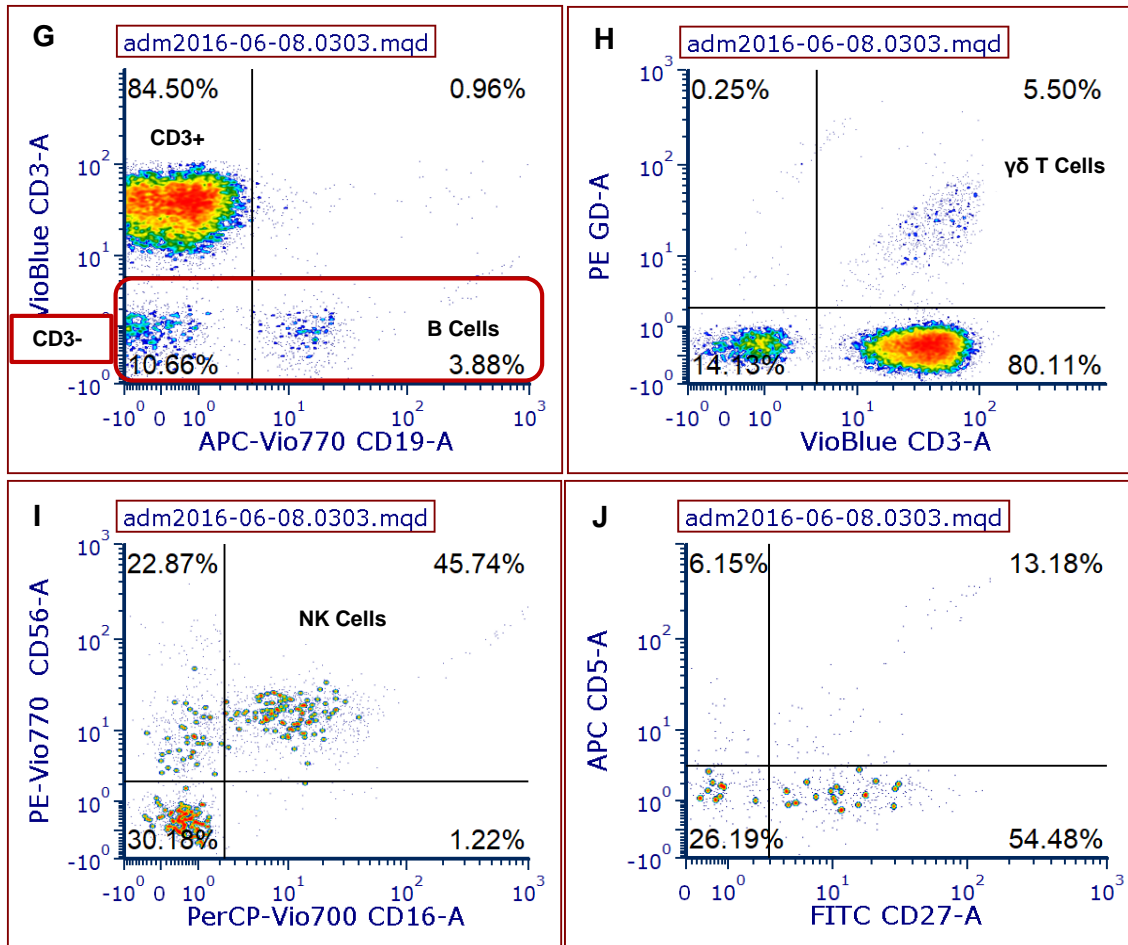

A.) PBMCs gated on live cells; B.) Gate on lymphocytes within the live cell gate; C.) T cells (CD3+) vs. B cells (CD19+) isotypes within the lymphocyte gate; D.)  $\gamma\delta$  T cell receptor vs. CD3 isotypes within the lymphocyte gate; E.) CD56 vs. CD16 isotypes within the CD3- gate; F.) CD5 vs. CD27 isotypes; G.) CD3+ (upper left quadrant) vs. B cells (lower right quadrant) within the lymphocyte gate (the CD3- gate is highlighted); H.)  $\gamma\delta$  T cells (upper right quadrant) within the lymphocyte gate; I.) Natural Killer cells (upper right quadrant) within the CD3- gate; J.) CD5 vs. CD27 within the B cell gate.

**Supplemental Figure III.** Flow cytometry gating for CD4+ Th1/Th2/Th17 and CD8+ Tc1/Tc2/Tc17 cells

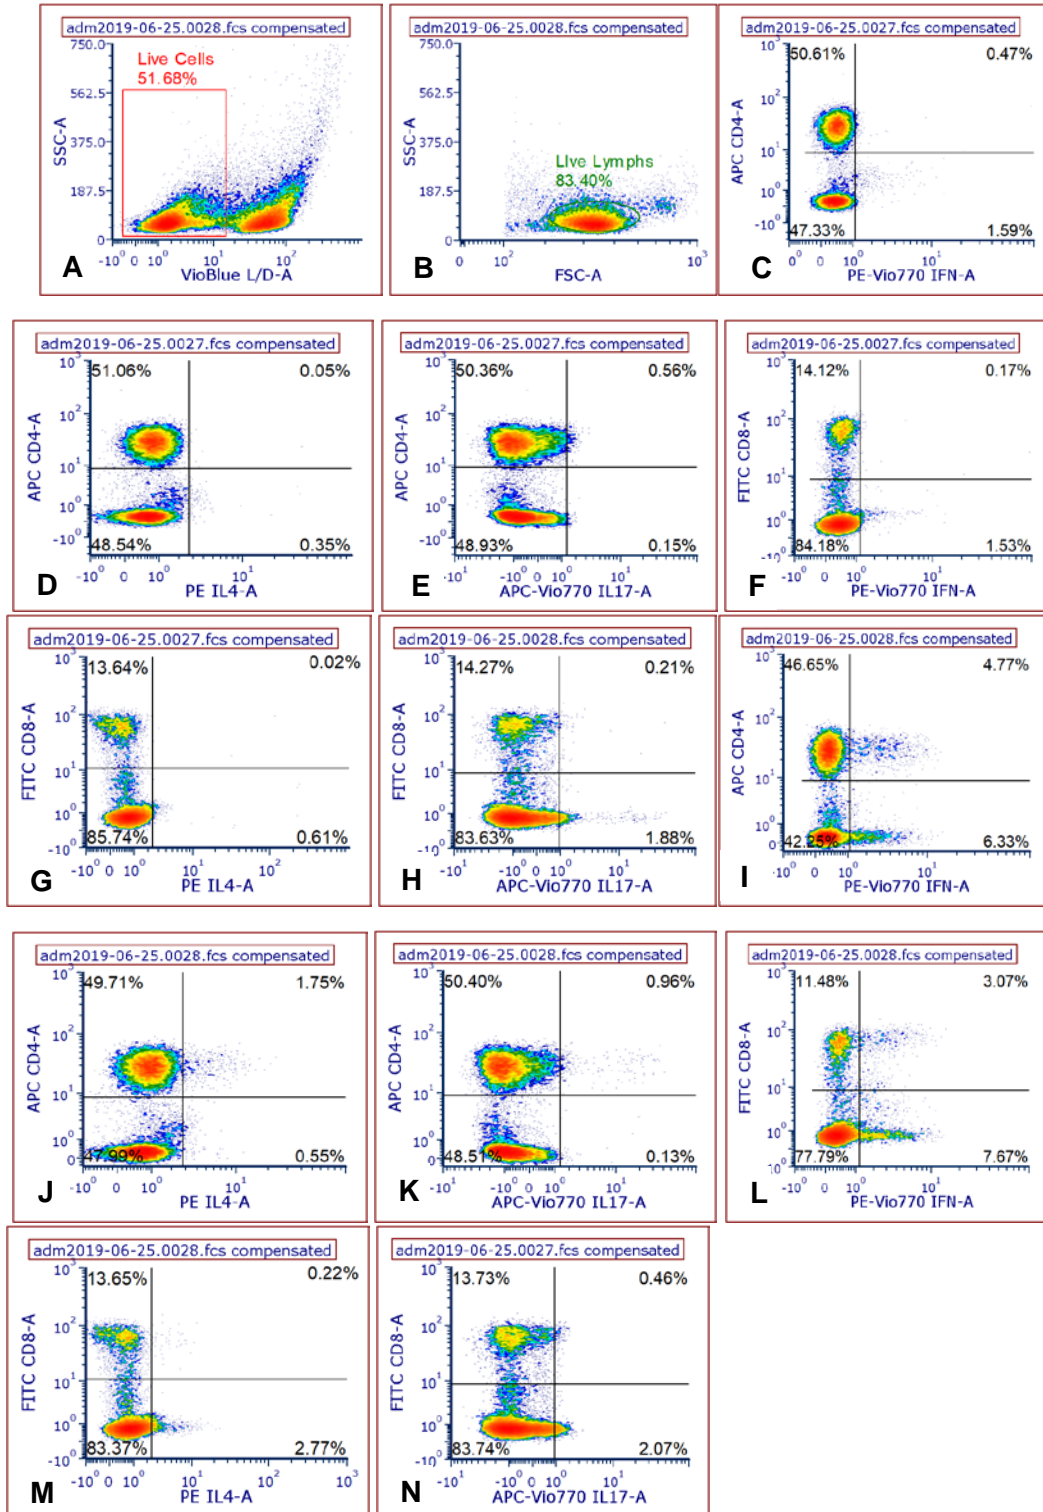

A.) PBMCs gated on live cells; B.) Gate on lymphocytes within the live cell gate; C.) CD4+ vs. interferon-gamma (labeled in the plots as IFN- $\gamma$ ) isotype within the lymphocyte gate; D.) CD4+ vs. IL-4 isotype within the lymphocyte gate; E.) CD4+ vs. IL-17A isotype within the lymphocyte gate; F.) CD8+ vs. IFN- $\gamma$  isotype within the lymphocyte gate; G.) CD8+ vs. IL-4 isotype within the lymphocyte gate; H.) CD8+ vs. IL-17A isotype within the lymphocyte gate; I.) CD4+IFN- $\gamma$ + (upper right quadrant) within the lymphocyte gate; J.) CD4+IL-4+ (upper right quadrant) within the lymphocyte gate; K.) CD4+IL-17A+ (upper right quadrant) within the lymphocyte gate; L.) CD8+IFN- $\gamma$ + (upper right quadrant) within the lymphocyte gate; M.) CD8+IL-4+ (upper right quadrant) within the lymphocyte gate; N.) CD8+IL-17A+ (upper right quadrant) within the lymphocyte gate. These assays were performed in the Multi-Ethnic Study of Atherosclerosis (MESA) cohort only.

**Supplemental Figure IV.** Flow cytometry gating scheme for Th1/Th2/Th17 phenotyping using cell-surface labeling of chemokine receptors

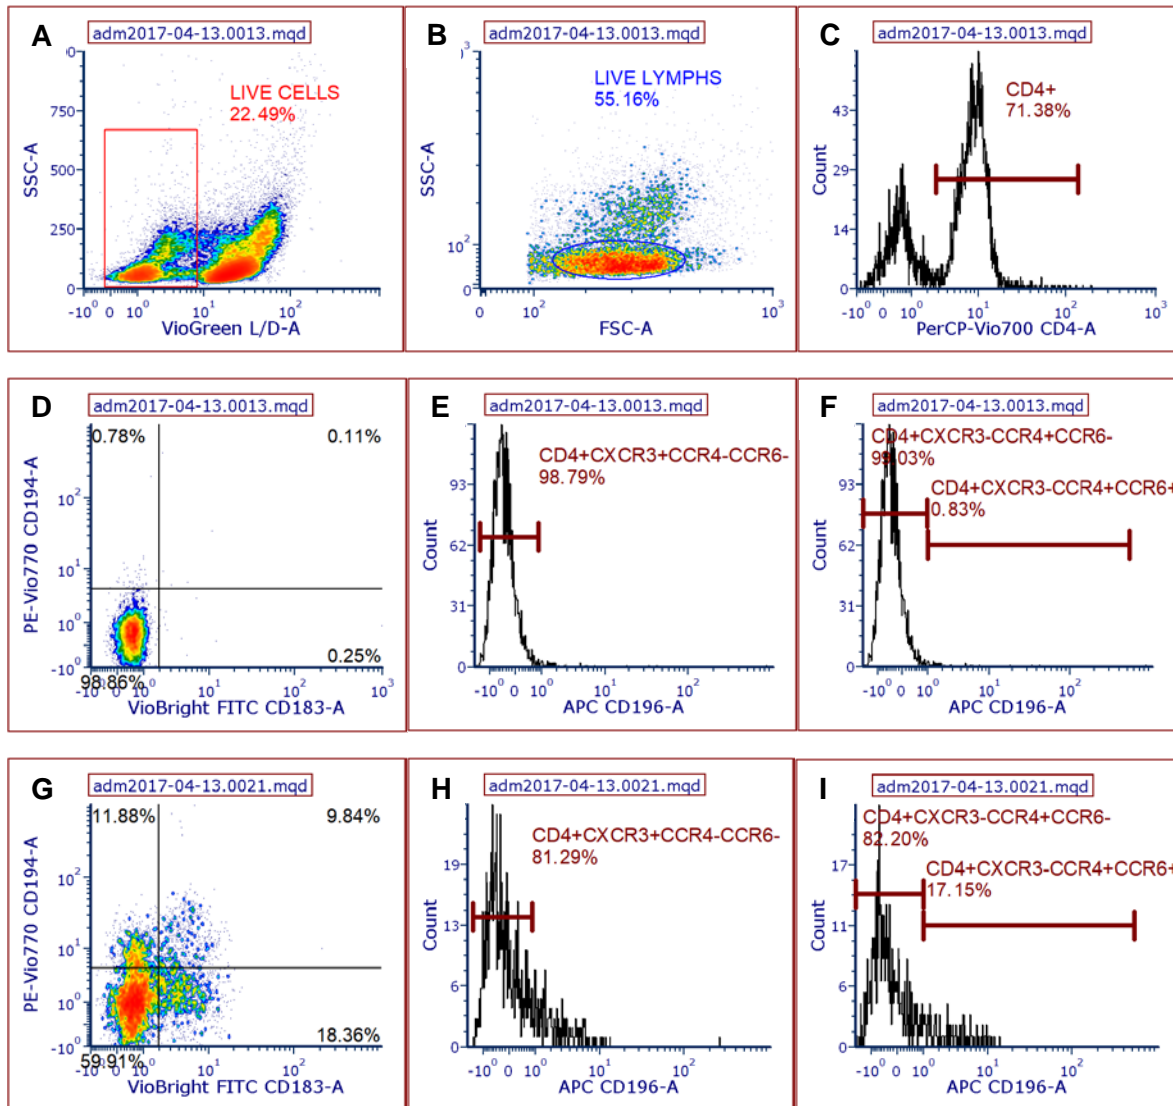

A.) PBMCs gated on live cells; B.) Gate on lymphocytes within the live cell gate; C.) Gate on CD4+ cells within the lymphocyte gate; D.) CCR4 (CD194) vs. CXCR3 (CD183) isotypes within the CD4+ gate; E.) CCR6- (CD196) isotype within the CD4+CXCR3+CCR4- gate (lower right quadrant of panel D); F.) CCR6+ and CCR6- (CD196) isotypes within the CD4+CXCR3-CCR4+ gate (upper left quadrant of panel D); G.) CCR4 (CD194) vs. CXCR3 (CD183) isotype within the CD4+ gate; H.) CCR6- (CD196) isotype within the CD4+CXCR3+CCR4- gate (lower right quadrant of panel D); I.) CCR6+ and CCR6- (CD196) isotype within the CD4+CXCR3-CCR4+ gate (upper left quadrant of panel D). These assays were performed in the Cardiovascular Health Study (CHS) cohort only.

**Supplemental Figure V.** Flow cytometry gating scheme for T regulatory cells

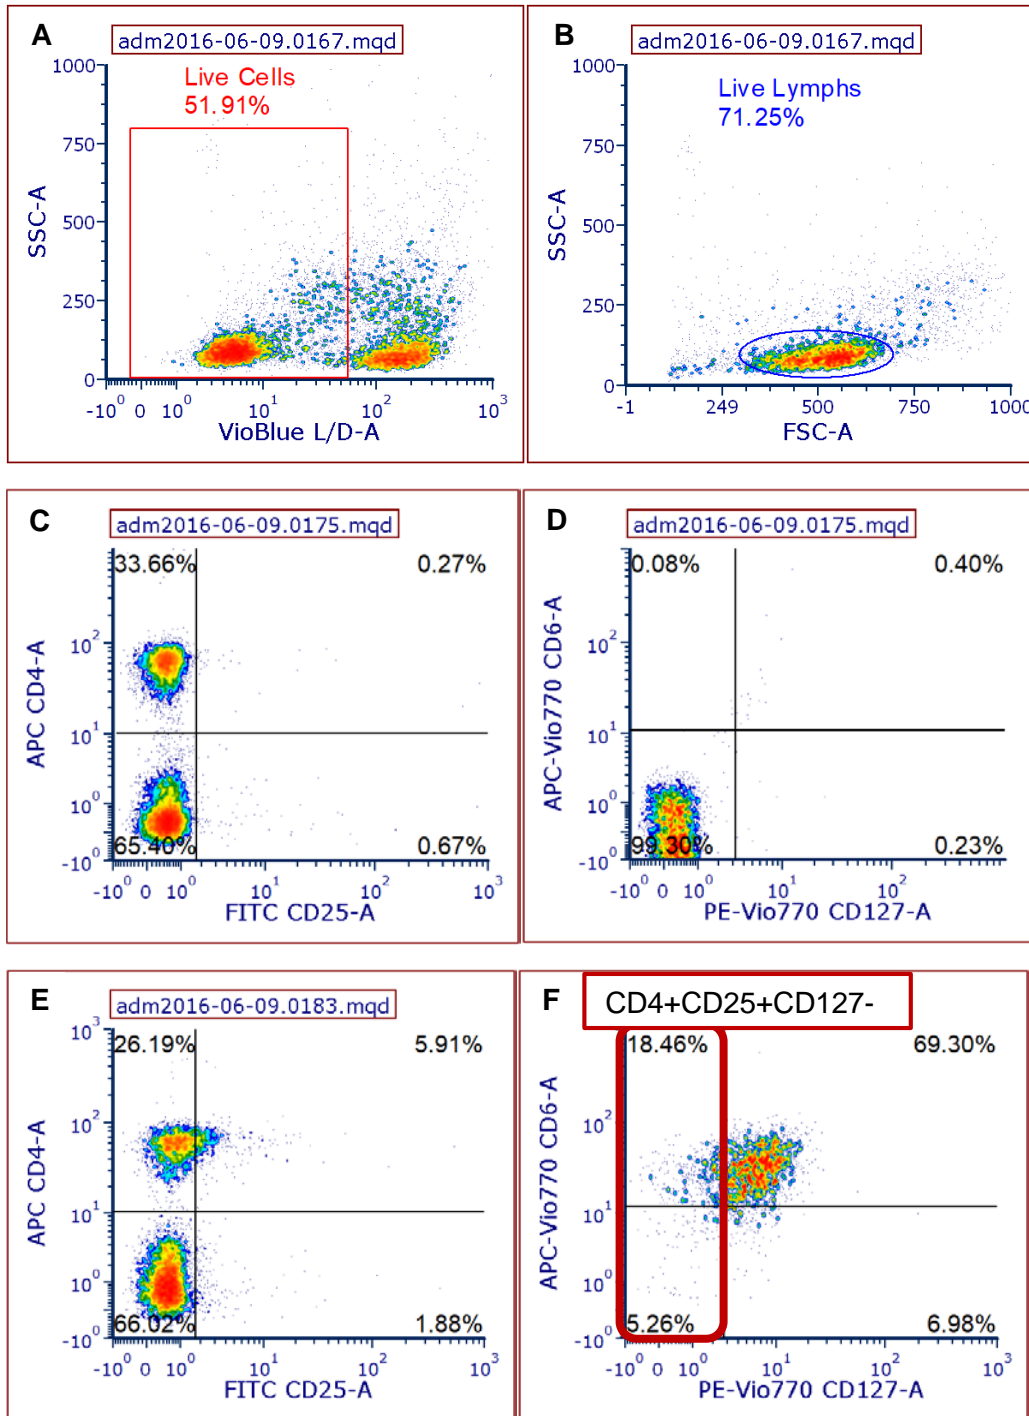

A.) PBMCs gated on live cells; B.) Gate on lymphocytes within the live cell gate; C.) CD4+ vs. CD25 isotype within the lymphocyte gate; D.) CD6 vs. CD127 isotypes within the CD4+CD25+ gate; E.) CD4+CD25+ cells (upper right quadrant) within the lymphocyte gate; F.) CD6 vs. CD127 within the CD4+CD25+ gate with the CD4+CD25+CD127- gate highlighted.



**Supplemental Figure VI.** Flow cytometry gating for differentiated CD4+ T cell subsets

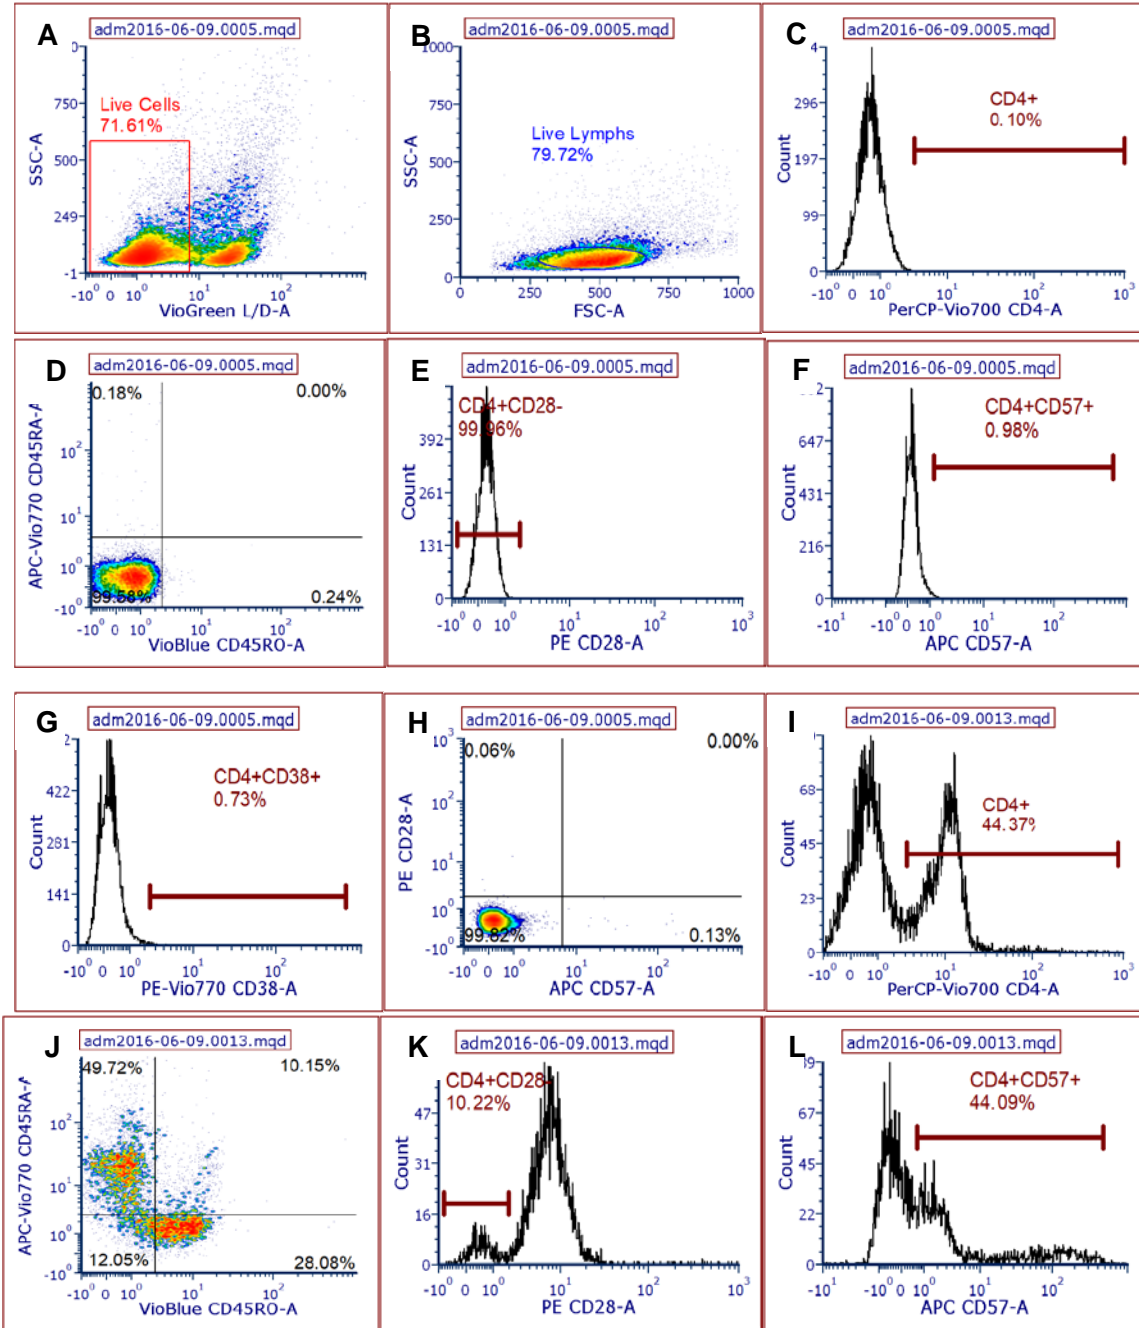

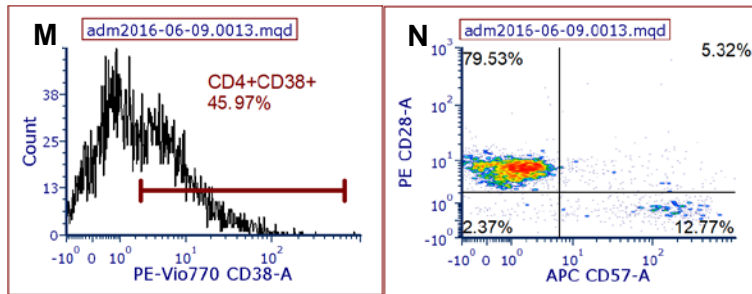

A.) PBMCs gated on live cells; B.) Gate on lymphocytes within the live cell gate; C.) Gate on CD4+ isotype within the lymphocyte gate; D.) CD45RA+ vs. CD45RO+ isotype within the CD4+ gate; E.) CD28- isotype within the CD4+ gate; F.) CD57+ isotype within the CD4+ gate; G.) CD38+ isotype within the CD4+ gate; H.) CD28 vs. CD57 isotype within the CD45RA+ gate; I.) CD4+ population; J.) CD45RA+ (upper left quadrant) vs. CD45RO+ (lower right quadrant); K.) CD28- cells within the CD4+ gate; L.) CD57+ cells within the CD4+ gate; M.) CD38+ cells within the CD4+ gate; N.) CD4+CD28-CD57+CD45RA+ (TEMRA) cells (lower right quadrant) within the CD4+CD45RA+ gate. Flow cytometry for CD8+ subsets followed the same gating strategy with CD8 substituted for CD4.
